# Supplementary material for: Near-infrared absorption properties of RbxWO3 nanoparticles
Source: Royal Society of Chemistry journal article supplement (doi:10.1039/c2ce25460c), 2012-01-01
Supplement: c2ce25460c.pdf [file c2ce25460c.pdf]

## **Near Infrared Absorption Properties of $\text{Rb}_x\text{WO}_3$ Nanoparticles**

**Chongshen Guo,\* Shu Yin, Qiang Dong and Tsugio Sato**

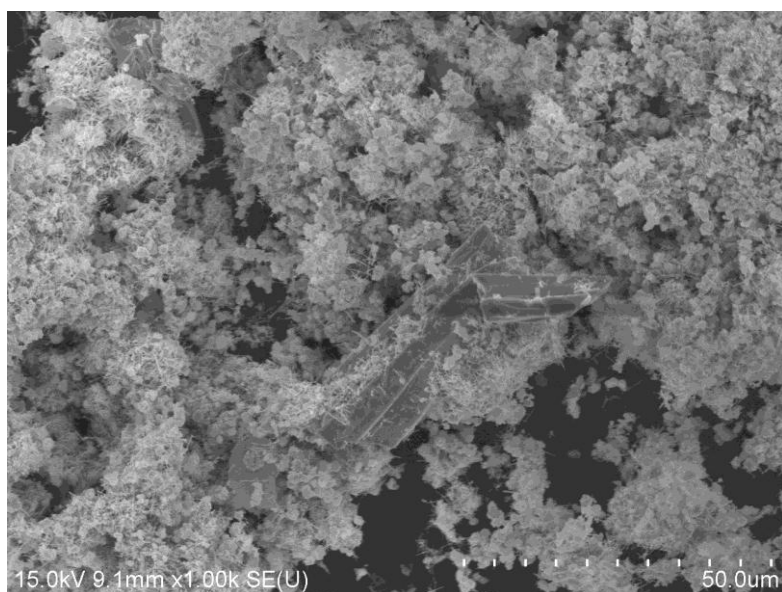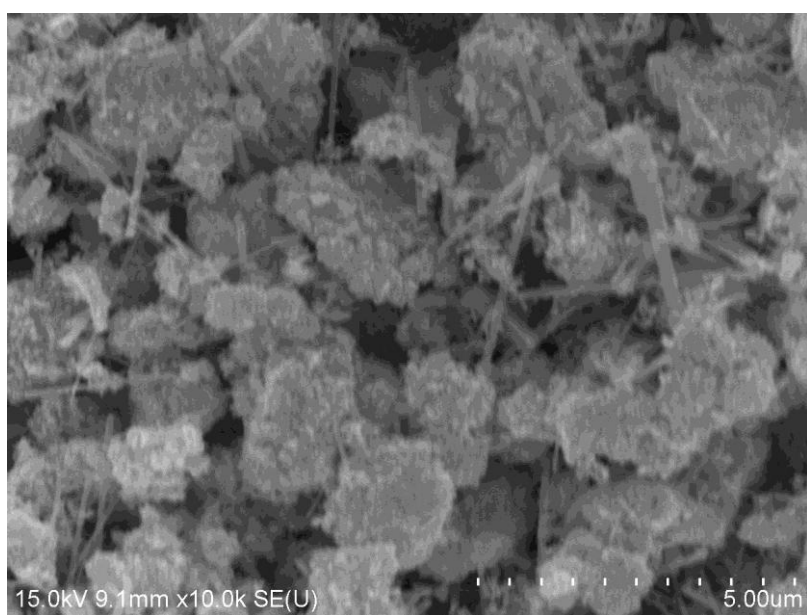

SEM images of sample synthesized in pure ethanol
